# Supplementary material for: Hic-5 regulates Src-induced invadopodia rosette formation and organization
Source: PubMed Central journal article supplement — Mol Biol Cell. 2019 May 15;30(11):1298–313. doi: 10.1091/mbc.E18-10-0629 (PMC6724605; doi:10.1091/mbc.e18-10-0629), 2019-05-15
Supplement: mbc-30-1298-s001.pdf [file mbc-30-1298-s001.pdf]

# Supplemental Materials

*Molecular Biology of the Cell*

Gulvady et al.

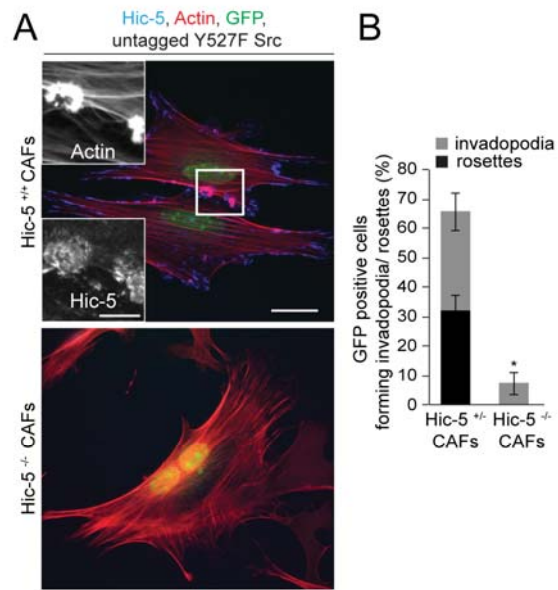

**Figure S1.** Hic-5 is required for formation of rosettes in active Src-transfected cancer-associated fibroblasts (CAFs). (A) Representative images of the control and Hic-5 knockout cancer-associated fibroblasts (CAFs) transfected with Y527F Src. Scale bar = 30 $\mu$ m. Inset showing F-actin and Hic-5 staining at the rosettes. Scale bar = 5 $\mu$ m (B) Quantitation of GFP-positive CAFs forming either invadopodia or rosettes (n= at least 80

cells). An unpaired Student's t test was performed. Data represent mean  $\pm$  s.e.m. of at least three independent experiments.  $p^* < 0.05$ .

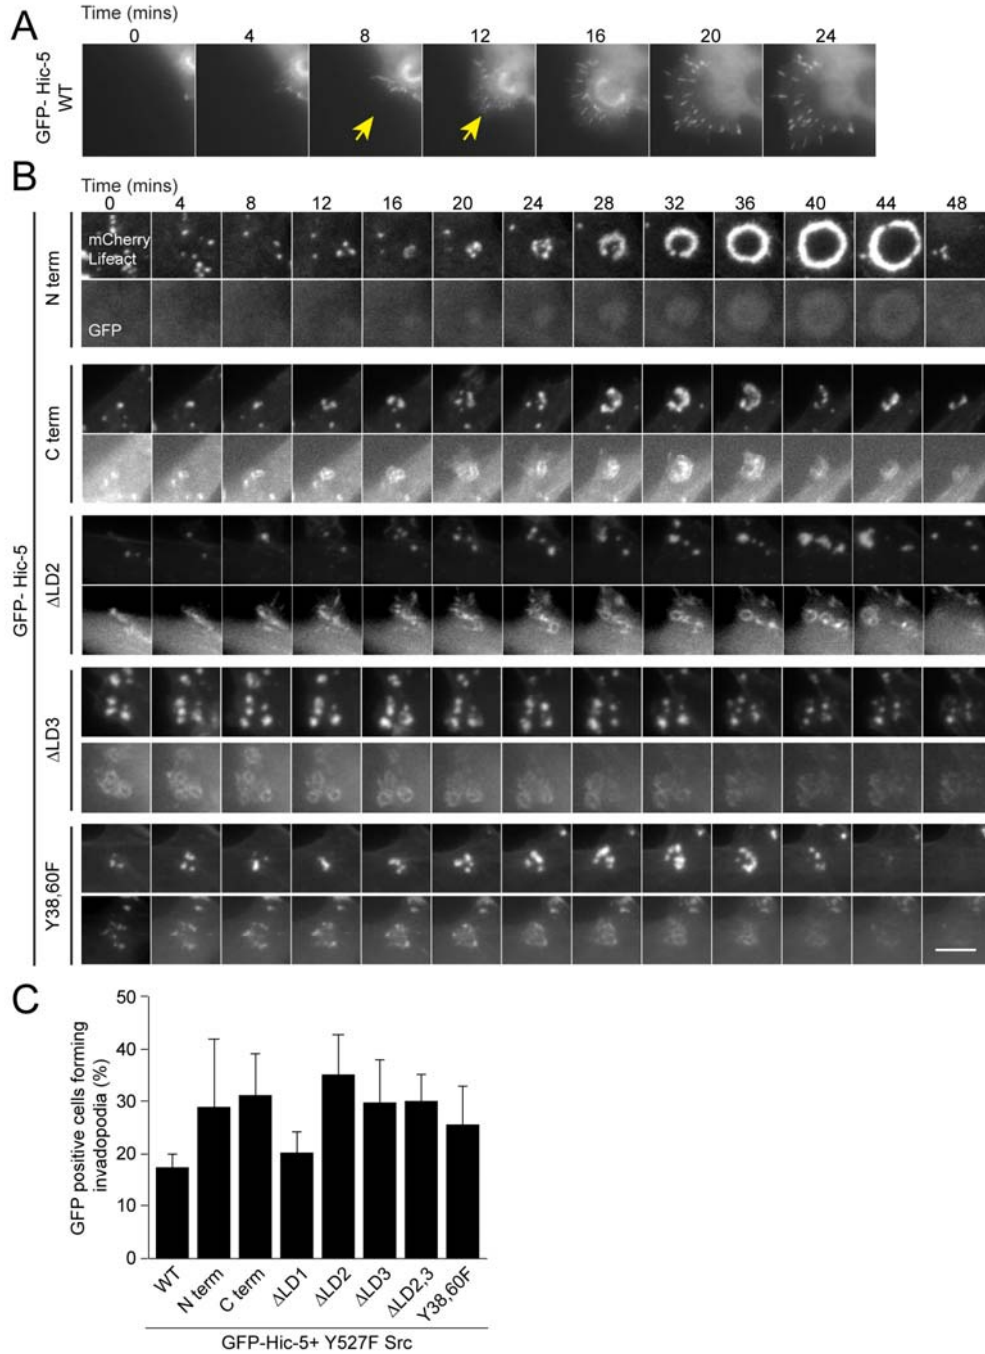

**Figure S2.** Hic-5 LD2 and LD3 motifs, along with the Y38,60 phosphorylation sites are required for rosette formation. (A) Time-lapse imaging of Y527F Src-transfected cells

expressing GFP-Hic-5 WT. Yellow arrows pointing at rapid, local lamellipodial bursts closely correlated with rosette disassembly. (B) Time-lapse imaging of Y527F Src-transfected cells expressing mCherry-Lifeact and GFP-Hic-5 N-terminus, C-terminus, or GFP-Hic-5  $\Delta$ LD2,  $\Delta$ LD3 or Y38,60F mutants. Scale bar = 5 $\mu$ m. (C) Quantitation of cells expressing GFP-Hic-5 WT, N-terminus, C-terminus, or  $\Delta$ LD1,  $\Delta$ LD2,  $\Delta$ LD3,  $\Delta$ LD2,3 or Y38,60F mutants of Hic-5 forming invadopodia (n= at least 90 cells). A one-way ANOVA with a Dunnett's multiple comparison test was performed. Data represent mean  $\pm$  s.e.m. of at least three independent experiments.

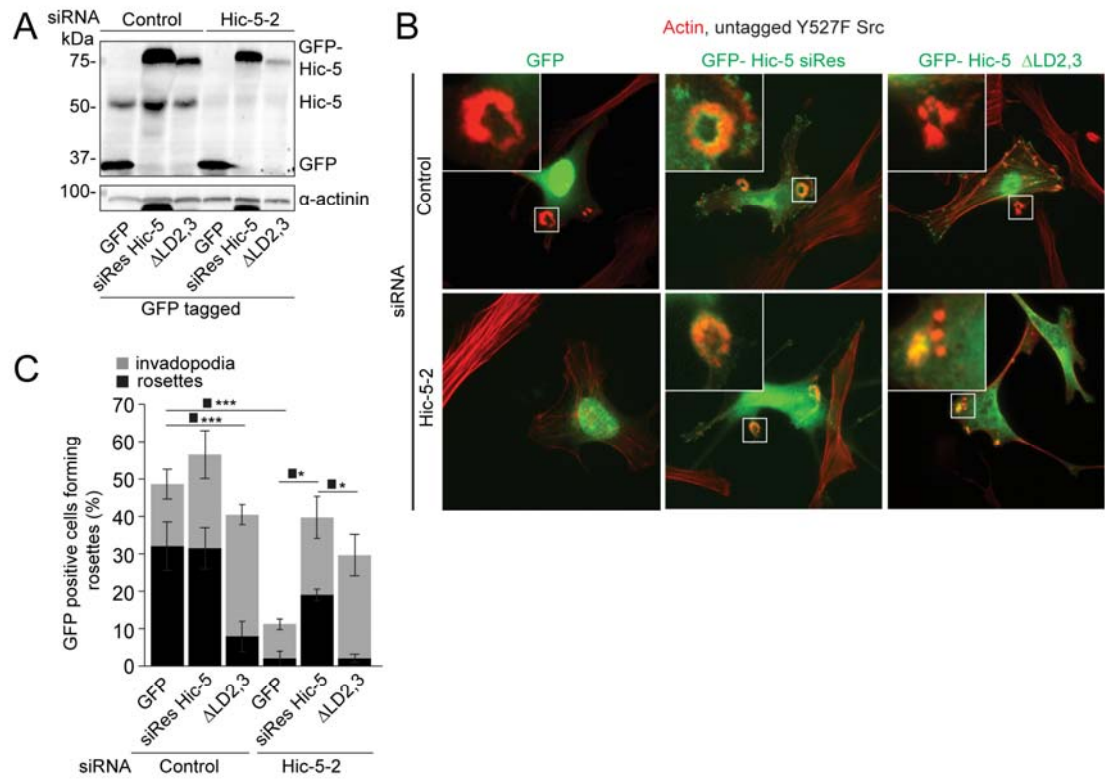

**Figure S3.** The Hic-5 N-terminal LD2,3 motifs are required for rosette formation in Y527F Src-transfected, Hic-5-deficient NIH3T3 fibroblasts. (A) Western blot of Y527F Src-transfected NIH3T3 fibroblast cell lysates post RNAi-mediated knockdown of Hic-5 and expressing either GFP, siRNA-resistant GFP-Hic-5 WT (siRes Hic-5) or GFP-Hic-5  $\Delta$ LD2,3 along with Y527FSrc. (B) Representative images of cells post RNAi-mediated

knockdown of Hic-5 and expressing either GFP, siRNA-resistant GFP-Hic-5 WT (siRes Hic-5) or GFP-Hic-5  $\Delta$ LD2,3. (C) Quantitation of GFP-positive cells forming either rosettes or invadopodia. (n= at least 70 cells). A one-way ANOVA with Sidak's multiple comparison test was performed. Data represent mean  $\pm$  s.e.m. of at least three independent experiments.  $p^* < 0.05$  and  $*** p < 0.001$ . The indicated p values on the graphs represent statistical significance performed between cells forming rosettes.

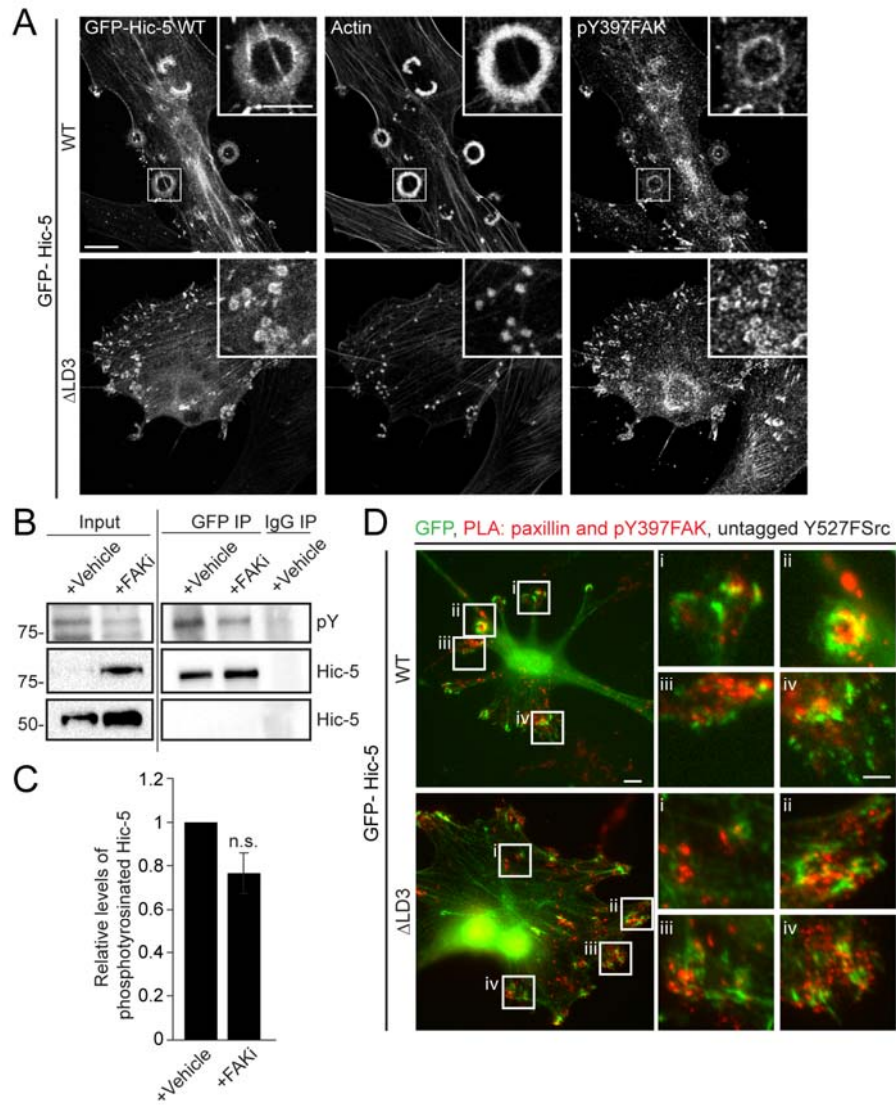

**Figure S4.** FAK-Src-mediated signaling induces downstream phosphorylation of Hic-5. (A) Representative images of Y527F Src-transfected NIH3T3 fibroblasts expressing GFP-Hic-5 WT or  $\Delta$ LD3 mutant showing individual channels of Hic-5, actin and pY397FAK. Scale bar = 10 $\mu$ m. Insets showing magnified images of rosettes and invadopodia clusters. Scale bar = 5 $\mu$ m. (B) Western blot of a GFP-immunoprecipitation

assay using cells expressing GFP-Hic-5 WT treated with or without FAK inhibitor (10 $\mu$ M), probed for pan tyrosine phosphorylation levels and Hic-5. (C) Quantitation of the relative levels of tyrosine-phosphorylated Hic-5 post-FAK inhibition. (D) Representative images of PLA-positive spots between endogenous paxillin and pY397FAK in cells expressing GFP-Hic-5 WT or GFP-Hic-5  $\Delta$ LD3 mutant. Scale bar = 10 $\mu$ m. Insets showing higher magnification of adhesions, invadopodia and rosettes. Scale bar = 5 $\mu$ m. An unpaired Student's t test was performed. Data represent mean  $\pm$  s.e.m. of at least three independent experiments.



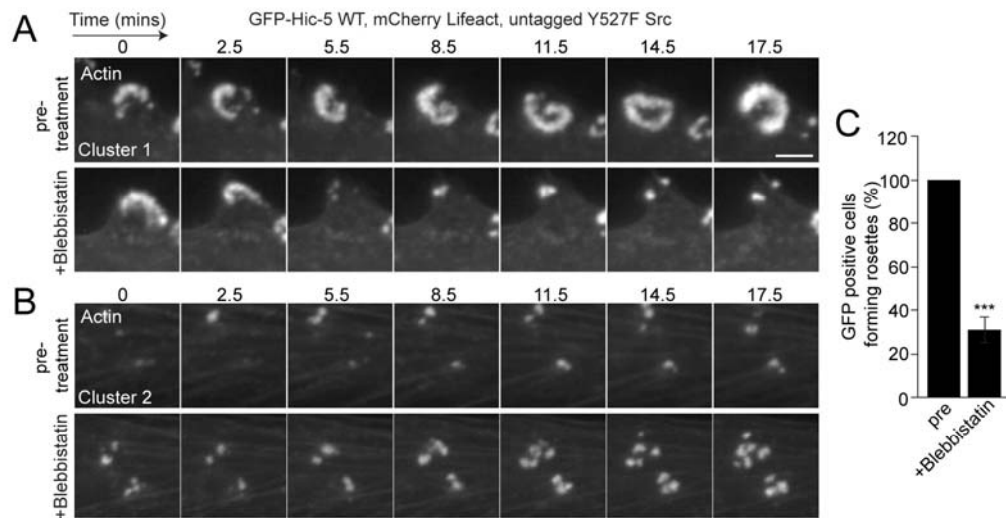

**Figure S5.** Myosin-II mediated contractility is required for rosette organization. (A) Montage of a rosette formed by a Y527F Src-transfected NIH3T3 fibroblast expressing GFP-Hic-5 WT and mCherry-Lifeact before and after treatment with the myosin-II inhibitor, Blebbistatin (5µM). (B) Montage of invadopodia clusters formed by a Y527F Src-transfected NIH3T3 fibroblast expressing GFP-Hic-5 WT and mCherry-Lifeact before and after treatment with the myosin-II inhibitor, Blebbistatin (5µM). (C) Bar graph showing the percentage of GFP positive cells forming rosettes before and after treatment with Blebbistatin.

and after treatment with Blebbistatin (5 $\mu$ M). (C) Quantitation of GFP-Hic-5 WT expressing cells forming rosettes before and after Blebbistatin treatment (5 $\mu$ M). (n= at least 13 cells). An unpaired Student's t test was performed. Data represent mean  $\pm$  s.e.m. of at least three independent experiments. \*\*\* p<0.001.
